# Supplementary material for: Significance of PTEN Mutational Status Associated Gene Signature in the Progression and Prognosis of Endometrial Carcinoma
Source: Research Square preprint supplement (doi:10.21203/rs.3.rs-724760/v1), 2021-08-03
Supplement: Supplementary file 1 [file 85c780712ce126137bfc0f5c.docx]

| Gene | Sequences of the primers |
| --- | --- |
| GDPD2 | F:5' TCTTCCTCACCTTCCTCCTTTCCC 3'  R:5’ CTATGCCACTCCTGCTGCCATTG 3’ |
| GRB7 | F:5' TAGACGGAGCCAGACTTCGGAAC 3’  R:5’ CGGTGGTTGGGATGAGGAGAGG 3’ |
| KCNK9 | F:5' TCACCTGCTCATACTCGCTCTCC 3’  R:5’ GCCGCTCATCCTCACTGTTCATG 3’ |
| MUC3A | F:5' GCTCCAGACCAGATGCCAGAATG 3’  R:5’ TCACCTGCTCATACTCGCTCTCC 3’ |
| MYT1 | F:5’ GATCCTTCCAAGAGTAGCTCCAATTCC 3’  R:5' CTGTGGCTTCGTGCTGAGGTTC 3’ |
| RPS6KA6 | F:5’ GAGCACCTCACAGCAATACTCCATC 3’  R:5' ATACTCTGACCCTGGGACACACTG 3’ |
| TSPYL5 | F:5' CGACGGAAGGCAGCATGGATAC3'  R:5’ CACTGGATTGGAGTAGAACGAGACAC 3’ |
| GAPDH | F:5’ CAAGGCTGTGGGCAAGGTCATC 3’  R:5’ GTGTCGCTGTTGAAGTCAGAGGAG 3’ |
